# Supplementary material
Source: publisher figshare collection journal article supplement (https://acs.figshare.com/ndownloader/files/17412758)
Supplement: Supplementary file 1 [file 17412758]

## Supporting Information

Bisdemethoxycurcumin protects cardiomyocyte mainly depends on Nrf2/HO-1 activation mediated by PI3K/AKT pathway

Xing Li<sup>†</sup>, Cong Huo<sup>†</sup>, Yuan Xiao<sup>†,§</sup>, Rong Xu<sup>†</sup>, Yan Liu<sup>†</sup>, Xin Jia<sup>†</sup>, Xiaoming Wang<sup>\*,†</sup>

<sup>†</sup> Department of Geriatrics, Xijing Hospital, Fourth Military Medical University, Xi'an 710032, P.R China

<sup>§</sup> Hong-Hui Hospital, Xi'an Jiaotong University College of Medicine, Xi'an 710054, P.R China

\*Corresponding author: Prof. Xiao-Ming Wang, Department of Geriatrics, Xijing Hospital, Fourth Military Medical University, Xi'an 710032, P.R China

E-mail: [xmwang@fmmu.edu.cn](mailto:xmwang@fmmu.edu.cn) Tel: 86-029-84775543

### There are two figures in SI

| Content of SI | Location |
|---------------|----------|
| Figure S1     | Page S2  |
| Figure S2     | Page S2  |

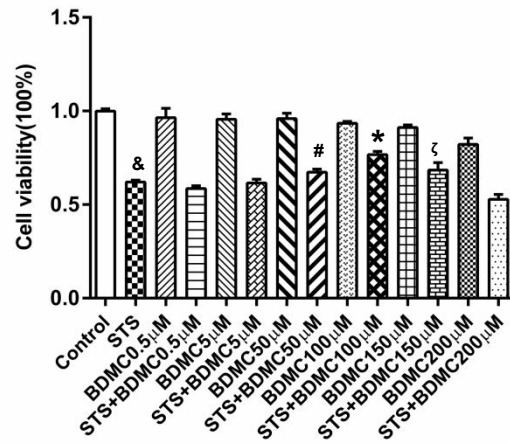

**Figure S1.** The optimum concentration of BDMC was searched in different concentration gradient from 0.5μM to 200μM in STS induced cardiomyocyte injury model. The optimum concentration of BDMC is 100μM. &  $P < 0.05$ , STS vs Control; #  $P < 0.05$ , STS+BDMC50μM vs STS; \*  $P < 0.05$ , STS+BDMC100μM vs STS; ζ  $P < 0.05$ , STS+BDMC150μM vs STS;

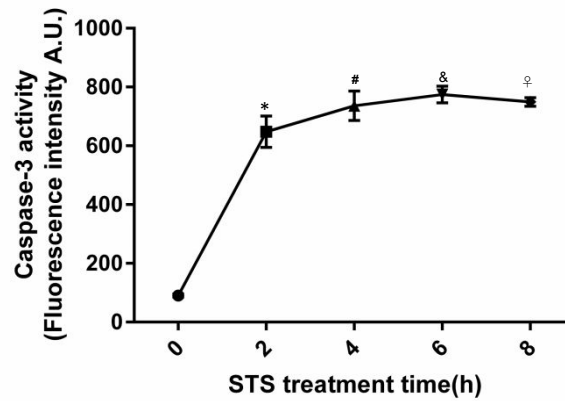

**Figure S2.** The caspase-3 activity is in STS treatment at different time points. Caspase-3 activity is highest at 6 hours after STS treatment. \*  $P < 0.05$ , 2 hours vs 0 hour; #  $P < 0.05$ , 4 hours vs 0 hour; &  $P < 0.05$ , 6 hours vs 0 hour; ζ  $P < 0.05$ , 8 hours vs 0 hour;
